# Supplementary material
Source: PubMed Central journal article supplement (PMC1061651)
Supplement: molcellb_25_7_2733__1.pdf [file molcellb_25_7_2733__1.pdf]

# Supplementary Figure S1

1 90  
**JIP3** MMEIQMDEGGGVVYQDDYDCSGSVMSERVSGLAGSIYREFFERLIHCYDEEVVKELMPLVVNVLENLDSVLSENQEHEVELELLREDNEQL  
**JIP4**  
**Consensus**

91 180  
**JIP3** LTQYEREKALRKQAEKFIIEFEDALEQEKKELQIQVEHYEFQTRQLELAKNYADQISRLEERESEMKKKEYNALHQHRTHEMIQTYVEHIE  
**JIP4** ..HN.M..L.  
**Consensus** MI Y EH E

181 265  
**JIP3** RSKMQQVGGSGQTESSLPGRSRKE**RPTSLNVFPL**--ADGM**VVR**--AQMGGKLV**PAGDHWHLSDLGQLQSSSSYQCPNDEMSESQ**--SSAAA  
**JIP4** .T.LH.LS..D.L.ATAHS.I.....I..GI...PAG..L**TPD**T.K..E-T.GSEQ.KFQE.S.PR.HT.LK---.L.DIS.GG.K.T  
**Consensus** R K Q QS Q E R R**KERP SL FPL** DG Q GG P W L Q S S DE S Q S A

266 355  
**JIP3** **TPSTTGT**KSNTPTSSVPSAA**VF**LNESLQPLGDYVSVTKNNKQAREKRSRNM**EVQVTQEMRNV**SIGMSSDEWSDVQDIIDSTPELDVC  
**JIP4** ..AS.---A.SDV.AI.PD---.SK.-----NEGFV.GTDTSNKSEI.KHI....A..T...TES.ENE.K.E..A..E.....MD  
**Consensus** **TP T N S P TP** E D K S EVQV QE RNV S G E S VQ II STPELD

356 445  
**JIP3** PETRLERTGSSPTQGI**VNKA**FGINTDSLYHELSTAGSEVIGDVDEGADLLGEFSGMGKEVGN**LLLENSQLLETKNALNVVKN**DLIAKVDQ  
**JIP4** KDLSGYKGS.T.K.E...DR..E..FE...S..GL.....-----R..E..I...T.....E  
**Consensus** S PT GI NKAF NT SL ELS AGS IGDVDEGADLL GMG EV **NL LEN QLLETKNALNVVKN**DLIAKVD

446 536  
**JIP3** **LSGEQEV**LK**GELEAAKQAKV**LE**ENRI**KELEELKRVKSEAVTARREPREVEEDDKIPMAQRRRFTRVEMARVLMERNQYKERLMELQEA**V**  
**JIP4** .TC.KD..Q....V....L...DKNR.....RKARA..ED..QKAKDD-D.SD..T...K.....  
**Consensus** **L E VL GELEA QKAK KLE** ELEEL EA AR D IP AQR RFRTRVEMARVLMERNQYKERLMELQEA**V**

537 622  
**JIP3** RWTE**MIRASRE**HPSVQEKKKSTIWQFFSRLFSSSSPPAKRSYPSVNIHYKSPTA--AGFSQRRSHALCQISAG-SRPLEFFPDD-DCT  
**JIP4** .....N.AM...R.S.....N--AT.KPE.P..LK.NA..SHVTPSVKK..ST.S.LPGDK.KAFD.LSEETEAS  
**Consensus** RWTE**MIRASRE** P QEKK S IWQFFSRLFSSS K P VN Y PT RS L Q S F

623 712  
**JIP3** SSARREQKREQYRQVREHVRNDDGRLQACGWSLPAKYKQLSPGGQEDTRMKNVPVYCRPLVEKDPSTKLWCAAGVNL**SGWKP**HEEDS  
**JIP4** LAS.....KA..QKE...V..F....Q....VA--N..GE.K...L....L...D...A.M....V.....G.TRDGG.  
**Consensus** RREQKREQYRQV HV DGR QA GWSLP KYKQ GQ T MKN PVPVY RPL EKD S KLWCA GVNLSG K S

713 796  
**JIP3** SNGPKPVGRDPLCTDREGEPEKSTHPSPE-----K**KKAKET**PEADATSSRVWILTSTLTTSKVVIIIDANQPGTIVDQFTVCNAHVLIC  
**JIP4** VV.AS--FYK.IAGL.T..SKQRSASQS.LDKLDQEL.EQQ..FKNQEEL..Q...C...HS.T..I...V...N.L.S....S....  
**Consensus** G V D D EG S K KE SS VWI TST T KV IIDA QPG I D FTVCN HVLC

797 874  
**JIP3** ISSIPAASDSYPPGEMFLDS-DVN-----PEDSGA--DGVLGAGITLVGCATR-CNVPRSNCSRRGDT**PVLDK**QGDVATTANGKVN  
**JIP4** .A.V.G.RET...A..ELSE.GQ.DKASLCGSMTSN.S.EM.SLLG...V...S.EGLTGAATSP.TN.AS...IE.--PPEME.E.SE.D  
**Consensus** I S P A DYP GE S V S A D L GIT VGC T S G PV K T N V

875 957  
**JIP3** PSQST-EEATEATEVPDPG**PSE**SEATTVRPGPLTEHVFTDPAPT-SSSTQ**PASE**NGSESNGTIVQPQVEP-----SGELSTTTSSAA**PT**  
**JIP4** ENIP.A.....-GNA.ST.DTVDISQ..VY.....LG**VQ**IPEDLS.VFQSSND.DVYKD.IS.L.NEQDLAR.EAQKM..LL..  
**JIP3** T EEATEATE G E PG TEHVFTDP P S Q V P E SS PT

958 1047  
**JIP3** MWLGAQNGWLYVHS**AVAN**WKKLHSIK**LKDSVLSLVHV**KGRVLVALADGTLAIFHRGEDGQWDL**SNYHLMDLGH**PHHSIRCM**AVV**NDRVW  
**JIP4** .....C.....S..Q.R.....I..I....I.....V.....L.....T..H.K..  
**Consensus** MWLGAQNG LYVHS VA W KCLHSIK**LKDS LS VHVKG VL**VALADGTLAIFHRG DGQWDL**SNYHL DLG** PHHSIRCM VV D VW

1048 1137  
**JIP3** CGYK**NKV**HVIQPK**MQ**IEK**S**FD**AHPR**ESQVRQLAWIGDGVVWSIRLDS**TLRL**YHAHT**QHLQ**DVDIEPYVSK**MLGTG**KLGF**S**FVRITAL  
**JIP4** ...R..IY.V...A.K.....K.....V.....Y.....  
**Consensus** CGY NK V QPK M IEK**S**FD**AHPR** ESQVRQLAW GDGVVWSIRLDS**TLRL**YHAHT **QHLQ**DVDIEPYVSK**MLGTG**KLGF**S**FVRITAL

1138 1226  
**JIP3** LIAGNRLWVG**TGN**VVISIPLTETVVLHRGQLLGLRANKTSPTS**GE**TRPGGIIHVYGDSSDKAA--SSFIPYCSMAQAQLCFHGH**RD**AV  
**JIP4** MVSC.....I.....-----G--P.N...SV.R...EN...VTPGT.....H.....  
**Consensus** NRLWVG**TGN**V ISIPLTET NKTS T G RPG I VYGD SDK FIPYCSMA AQLCFHGH**RD**AV

1227 1315  
**JIP3** KFFVSVPGNVLATLNGS-VLDS**PSE**GP**PA**ADA**EG**QKL**NAL**VL**SGG**EYIDFRIGDGEDDETECAGDVN**QTK**PLS**KA**ERSH**IV**  
**JIP4** ...A...Q.ISPQSS.GGA.LTADKA.SS.QEPSSQ-TP..SM..I.....M...-GG.S.LLGE.L-PL..VT.....LI.  
**Consensus** KFFV VPG V S D G A LK LV **SGG**EYIDFR GD E E E D PS KAERSH **IV**

1322  
**JIP3** WQVSYTPE#  
**JIP4** ...MCGN.#  
**Consensus** WQV E#

### **Supplementary Figure S1. Primary structure of JIP3 and JIP4**

Comparison of deduced amino acid sequence of JIP3 and JIP4. The numbering is based on the sequence of JIP3 $\alpha$  (3). Residues identical with JIP3 (.), deletions (-) and termination codon (#) are indicated. The consensus sequence is also presented. Conserved domains are highlighted in color, including the JNK binding domain (blue), JNK phosphorylation domain (pink), Leucine zipper domain (turquoise), and a putative transmembrane domain (green).
